# Supplementary material
Source: publisher figshare collection journal article supplement (https://acs.figshare.com/ndownloader/files/4284961)
Supplement: Supplementary file 1 [file 4284961]

# Low-coordination Sites in Oxygen-reduction Electrocatalysis: Their Roles and Methods for Removal

Yun Cai,<sup>†</sup> Chao Ma,<sup>‡</sup> Jia X. Wang,<sup>†</sup> Yimei Zhu,<sup>‡</sup> Radoslav R. Adzic<sup>\*†</sup>

<sup>†</sup>Chemistry Department and <sup>‡</sup>Condensed Matter Physics & Materials Science Department,

Brookhaven National Laboratory, Upton, NY 11973 USA

## SUPPORTING INFORMATION

This information is available free of charge via the Internet <http://pubs.acs.org>.

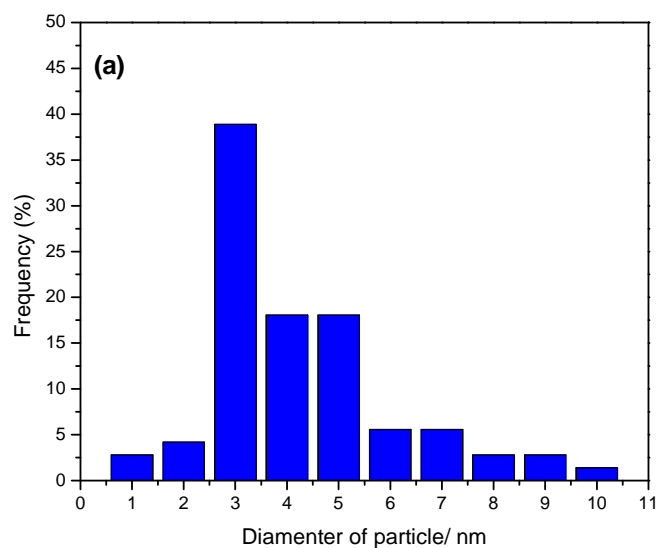

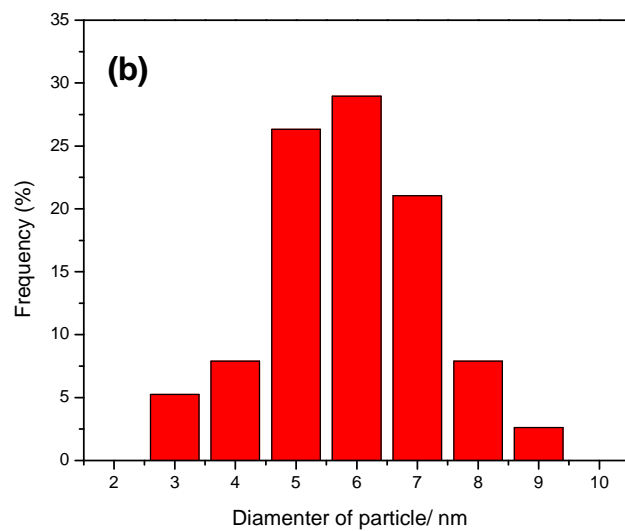

**Figure S1.** Size distributions of original Pd<sub>3</sub>Co/C (a), and Pt<sub>ML</sub> on Br-treated Pd<sub>3</sub>Co/C (b)

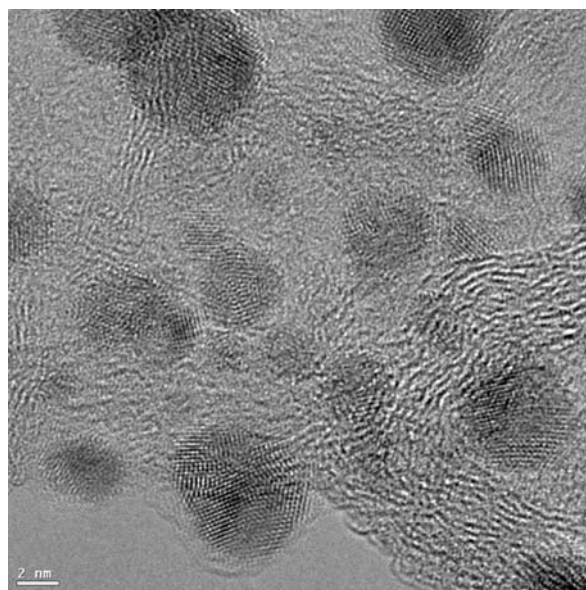

**(a)**

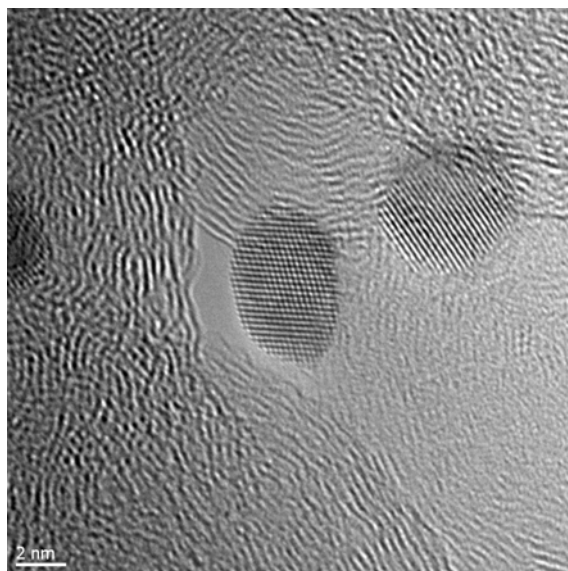

(b)

**Figure S2.** High resolution TEM images of Pd<sub>3</sub>Co/C (a) and Pt<sub>ML</sub> / Br-treated Pd<sub>3</sub>Co/C (b)

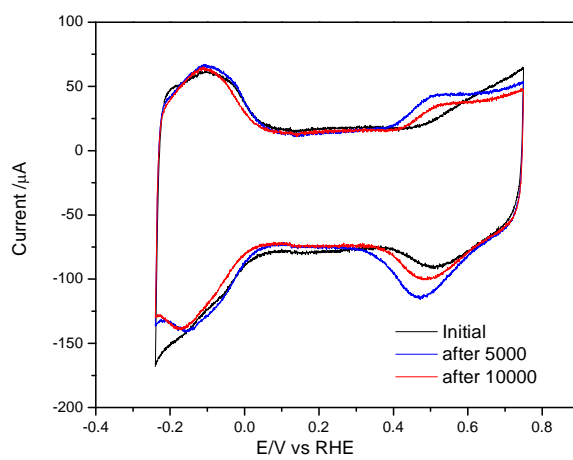

(a)

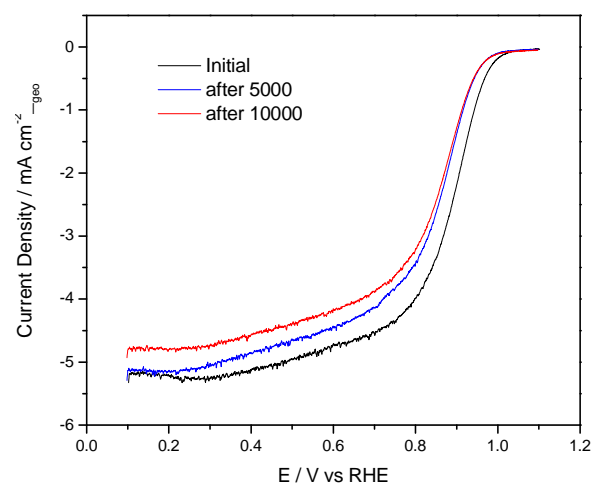

(b)

**Figure S3.** Stability tests on Pt<sub>ML</sub>/Pd<sub>3</sub>Co/C (JM). Protocol: triangle sweep between 0.6 to 1.0V at a scan rate of 50mV/s. (a) CV; (b) ORR.
